# Supplementary material
Source: PubMed Central journal article supplement (PMC4260588)
Supplement: pnas.201417717SI.pdf [file pnas.201417717SI.pdf]

# Supporting Information

Seijsing et al. 10.1073/pnas.1417717111

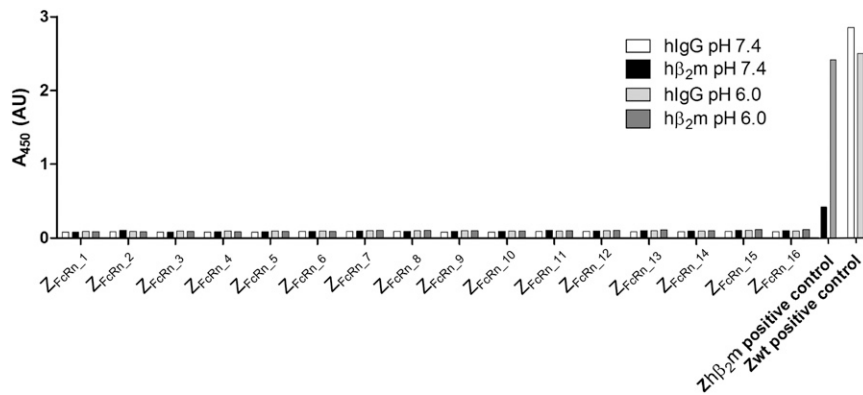

**Fig. S1.** Affibody specificity analysis by ELISA. An anti-ABD antibody was immobilized in the bottom of the wells and used to capture the affibody-ABD fusion proteins. Biotinylated hIgG or h $\beta_2$ m was added to the wells at pH 6.0 or 7.4, followed by addition of HRP-conjugated streptavidin and development with TMB substrate. The Zh $\beta_2$ m and Zwt positive controls were included to ascertain the function of the ELISA sandwich. The Zh $\beta_2$ m experiment used an affibody molecule binding to  $\beta_2$ m, taken from the initial screen after phage display selection. The Zwt experiment used the original affibody scaffold (binding IgG) fused to ABD. The y-axis corresponds to the  $A_{450}$  measured after development.

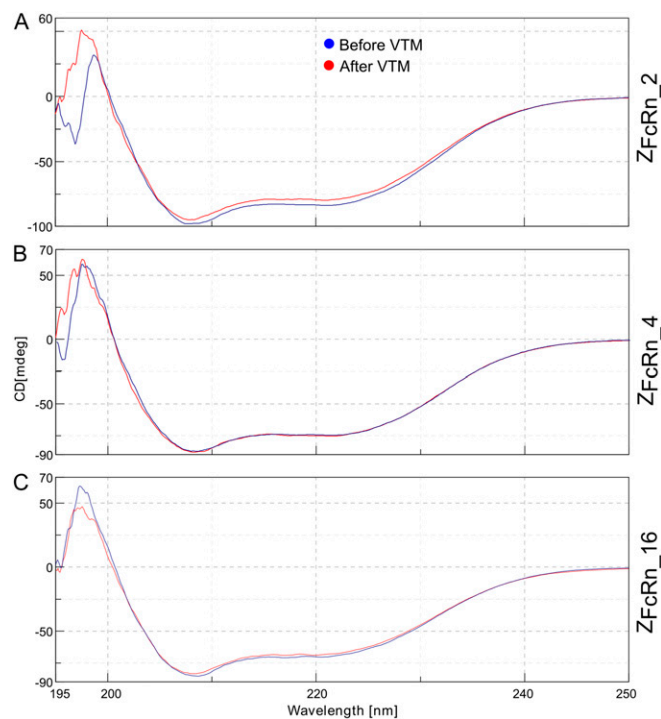

**Fig. S2.** Circular dichroism spectra from 250 to 195 nm, recorded before and after VTM for ZFcRn\_2 (A), ZFcRn\_4 (B), and ZFcRn\_16 (C). VTM consisted of thermal unfolding of the proteins by heating to 90 °C.

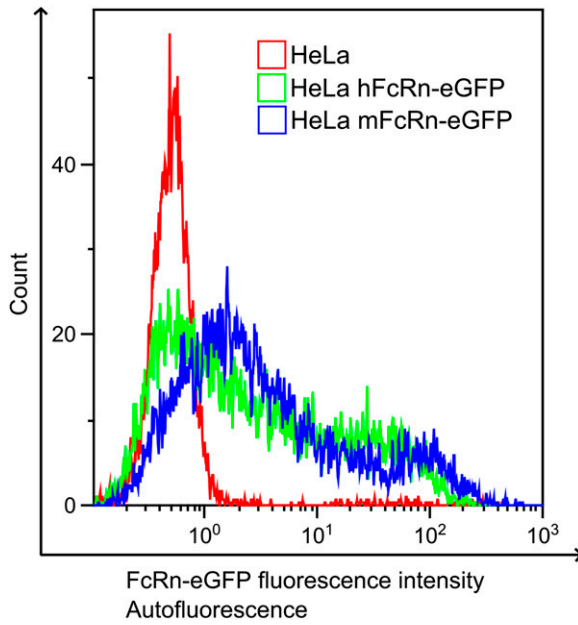

**Fig. S3.** Flow cytometry analysis of HeLa cells. The x-axis corresponds to an FcRn-eGFP/autofluorescence signal recorded in FL-1, and the y-axis corresponds to cell count. HeLa cells (red), HeLa cells expressing hFcRn-eGFP (green), and HeLa cells expressing mFcRn-eGFP (blue) were analyzed.

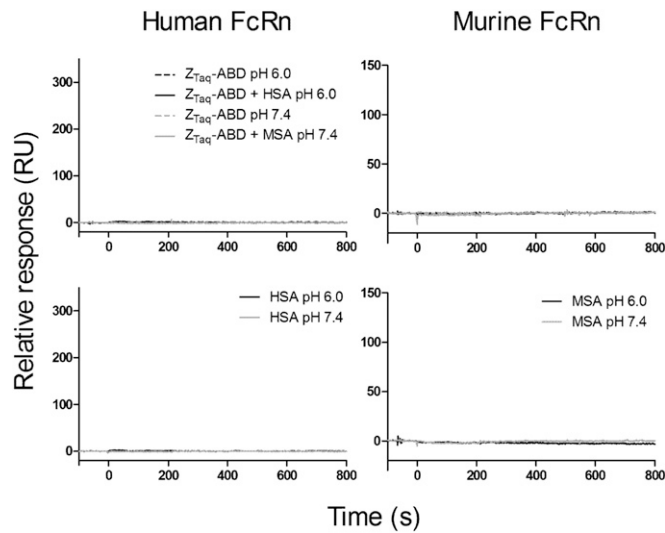

**Fig. S4.** Surface plasmon resonance analysis of the interaction between the control protein  $Z_{Taq}$ -ABD or SA and  $FcRn_{ECD}$ .  $Z_{Taq}$ -ABD was injected with or without previous incubation for 4 h with SA at pH 6.0 or 7.4. HSA or MSA was used, depending on the origin of  $FcRn_{ECD}$ . The binding of HSA and MSA to human or murine  $FcRn_{ECD}$  was also analyzed at pH 6.0 and 7.4.

**Table S1. Phage display selection parameters**

| Parameter                | Selection track |     |     |     |
|--------------------------|-----------------|-----|-----|-----|
|                          | 1               | 2   | 3   | 4   |
| Selection round 1        |                 |     |     |     |
| Blocking                 | HSA             | HSA | —   | —   |
| Target concentration, nM | 100             | 100 | 100 | 100 |
| Washes*                  | 2               | 2   | 2   | 2   |
| Elution, pH              | 8.0             | 2.2 | 8.0 | 2.2 |
| Selection round 2        |                 |     |     |     |
| Blocking                 | HSA             | HSA | —   | —   |
| Target concentration, nM | 50              | 50  | 50  | 50  |
| Washes*                  | 5               | 5   | 5   | 5   |
| Elution, pH              | 8.0             | 2.2 | 8.0 | 2.2 |
| Selection round 3        |                 |     |     |     |
| Blocking                 | HSA             | HSA | —   | —   |
| Target concentration, nM | 25              | 25  | 25  | 25  |
| Washes*                  | 8               | 8   | 8   | 8   |
| Elution, pH              | 8.0             | 2.2 | 8.0 | 2.2 |
| Selection round 4        |                 |     |     |     |
| Blocking                 | HSA             | HSA | —   | —   |
| Target concentration, nM | 10              | 10  | 10  | 10  |
| Washes*                  | 12              | 12  | 12  | 12  |
| Elution, pH              | 8.0             | 2.2 | 8.0 | 2.2 |

\*Number of washes of 2 min each.

**Table S2. Protein sequences**

|                                   |                                                            |
|-----------------------------------|------------------------------------------------------------|
| Library*                          | VDAKYAKEXXXAXXEIXXLPNLTXXQXXAFIXKLXDDPSQSSELLSEAKKLNDSQAPK |
| Z <sub>FcRn_2</sub> <sup>†</sup>  | -----QDA-AH--RW-----FD-RV---H--A-----                      |
| Z <sub>FcRn_16</sub> <sup>†</sup> | -----WMR-AH--RW-----FD-RV---H--E-----                      |
| Z <sub>FcRn_4</sub> <sup>†</sup>  | -----FES-AH--RW-----YD-RV---H--S-----                      |

\*Amino acid sequence of the library. X denotes varied positions in the library.

<sup>†</sup>"-" indicates identity with the library sequence.
